# Supplementary material for: Therapeutic efficacy of rscAAVrh74.miniCMV.LIPA gene therapy in a mouse model of lysosomal acid lipase deficiency
Source: PubMed Central journal article supplement (PMC9403906; doi:10.1016/j.omtm.2022.08.001), 2022-08-04
Supplement: mmc1.pdf [file mmc1.pdf]

OMTM, Volume 26

## Supplemental information

### **Therapeutic efficacy of rscAAVrh74.miniCMV.LIPA gene therapy in a mouse model of lysosomal acid lipase deficiency**

**Patricia Lam, Anna Ashbrook, Deborah A. Zygmunt, Cong Yan, Hong Du, and Paul T. Martin**

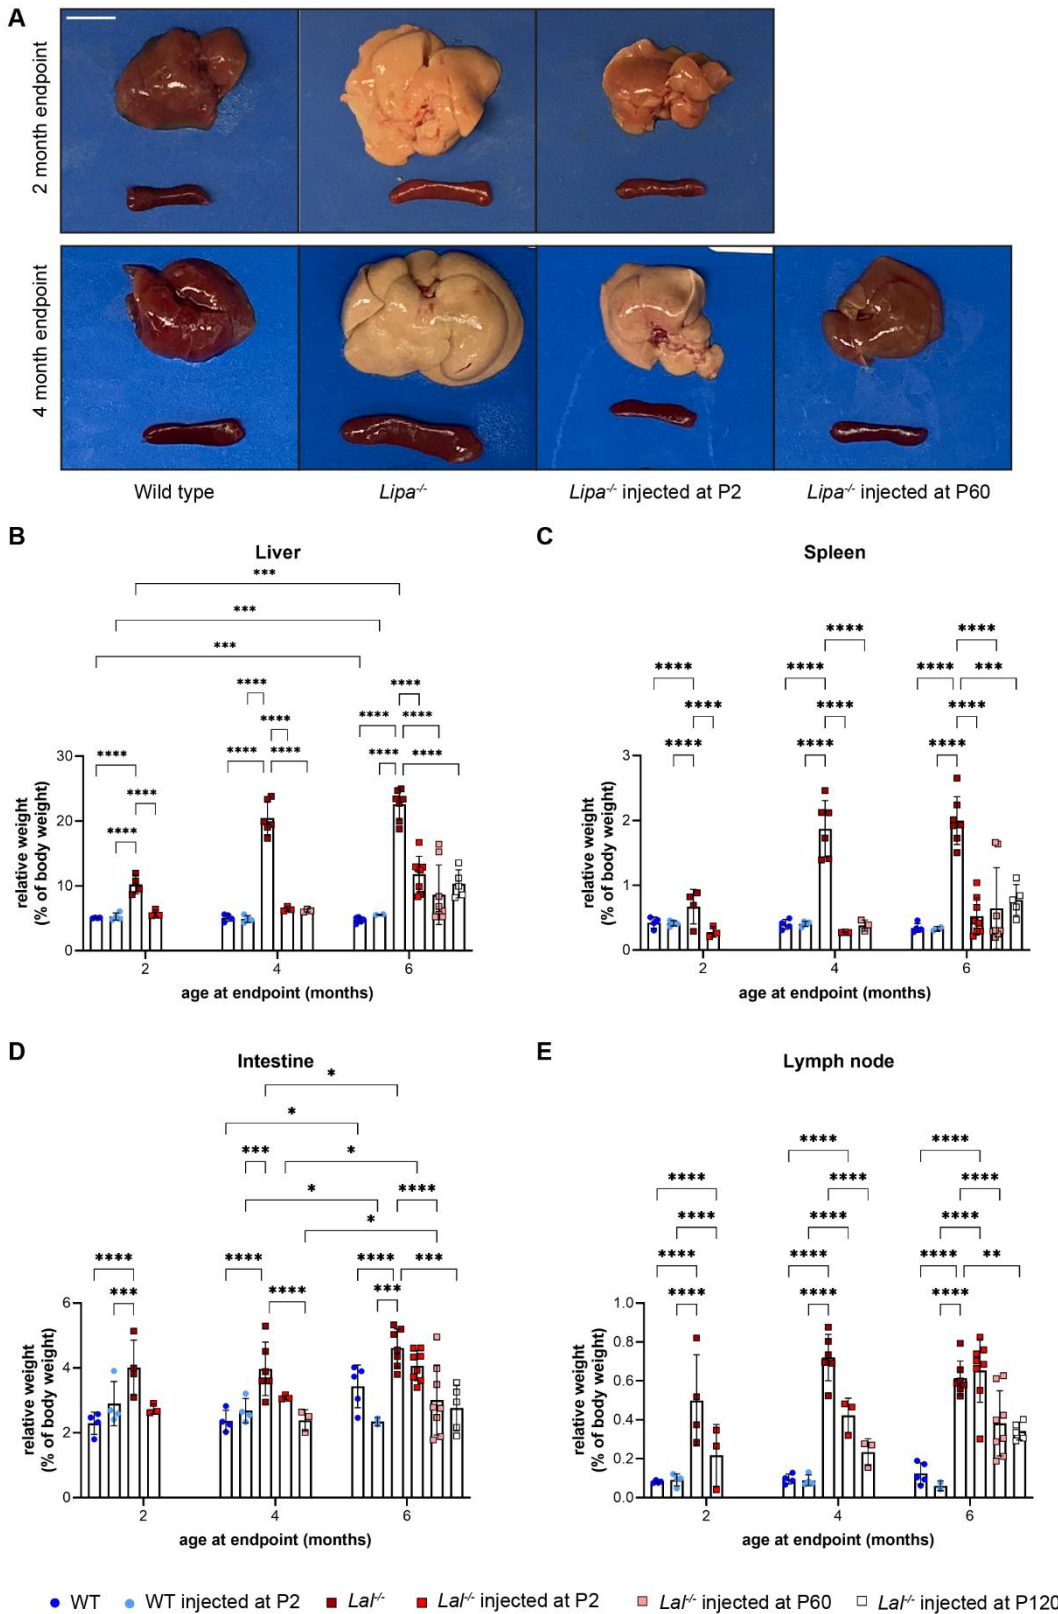

**Figure S1. Organ morphology and weight at study endpoints.**

**(A)** Gross morphology of liver and spleen at 2 months and 4 months of age. Scale bar = 1 cm. **(B-D)** Relative weights of the liver, spleen, intestine, and lymph node at 2, 4, and 6 months of age. All data represented as mean  $\pm$  SD (n=3-8). Statistical significance was defined as  $p \leq 0.05$  (\* $p \leq 0.05$ , \*\* $p \leq 0.01$ , \*\*\* $p \leq 0.001$ , \*\*\*\* $p \leq 0.0001$ ), using two-way ANOVA with Tukey's post-hoc test.

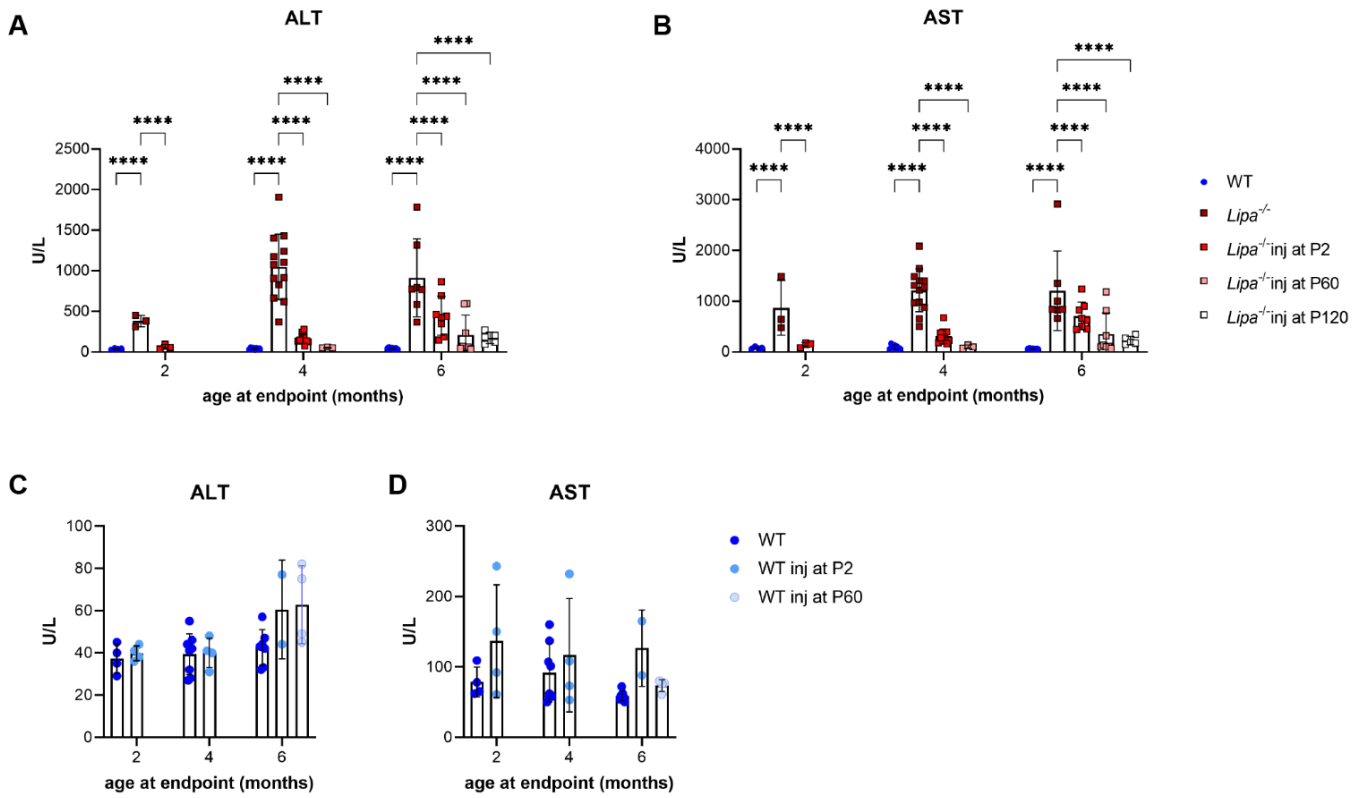

**Figure S2. Serum transaminase levels at 2, 4, and 6 months of age.**

**(A)** Serum ALT and **(B)** AST at 2, 4, 6 month endpoints of treated *Lipa*<sup>-/-</sup> mice. **(C)** Serum ALT and **(D)** AST at 2, 4, and 6 month endpoints of treated WT mice. All data represented as mean  $\pm$  SD (n=2-8). Statistical significance was defined as  $p \leq 0.05$  (\*\*\*\* $p \leq 0.0001$ ) using two-way ANOVA with Tukey's post-hoc test.

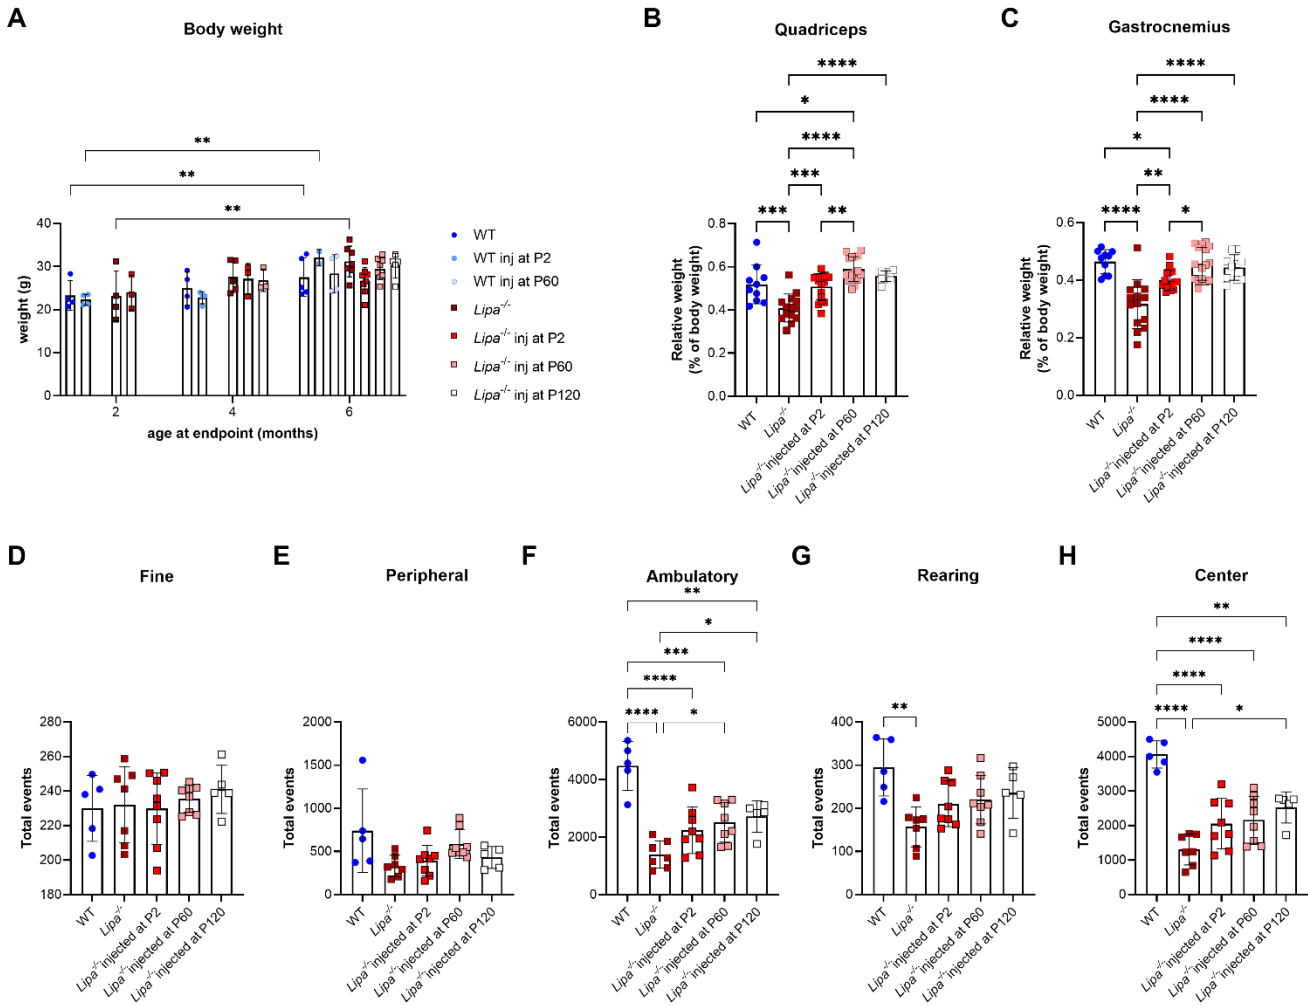

**Figure S3. Muscle atrophy may contribute to ambulation differences in *Lipa*<sup>-/-</sup> mice.**

**(A)** Body weight of mice at 2, 4, 6 months. **(B-C)** Relative weight of gastrocnemius muscle and quadriceps muscle at 6 months. **(D-H)** Open field analysis at 6 months. All data represented as mean  $\pm$  SD (n=5-8). Statistical significance was defined as  $p \leq 0.05$  (\* $p \leq 0.05$ , \*\* $p \leq 0.01$ , \*\*\* $p \leq 0.001$ , \*\*\*\* $p \leq 0.0001$ ), using two-way ANOVA (A) one-way ANOVA (B-H) with Tukey's post-hoc test.

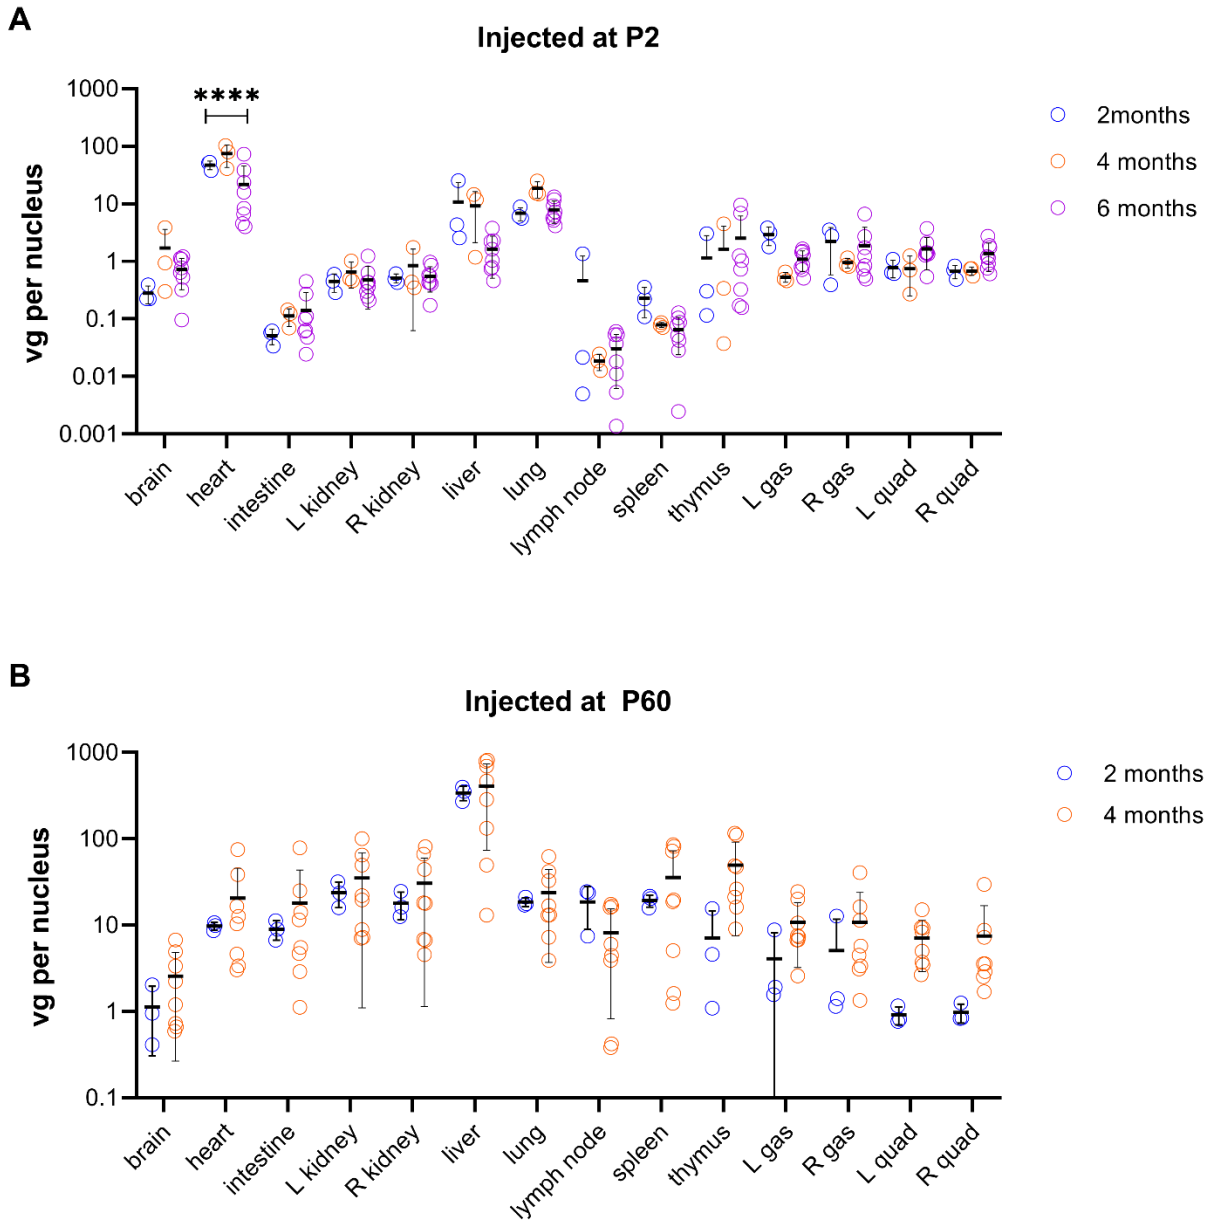

**Figure S4. AAV vector genomes are relatively stable over time.**

**(A)** Biodistribution of AAV in organs and tissues at 2-, 4-, and 6-months post-injection of *Lipa*<sup>-/-</sup> mice treated at P2. Change in vector genomes found in the heart is the only statistically significant change. **(B)** Biodistribution of AAV in organs and tissues at 2- and 4-months post-injection of *Lipa*<sup>-/-</sup> mice treated at P60. All data represented as mean  $\pm$  SD (n=5-8). Statistical significance was defined as  $p \leq 0.05$  (\*\*\*\* $p \leq 0.0001$ ), using two-way ANOVA with Tukey's post-hoc test.

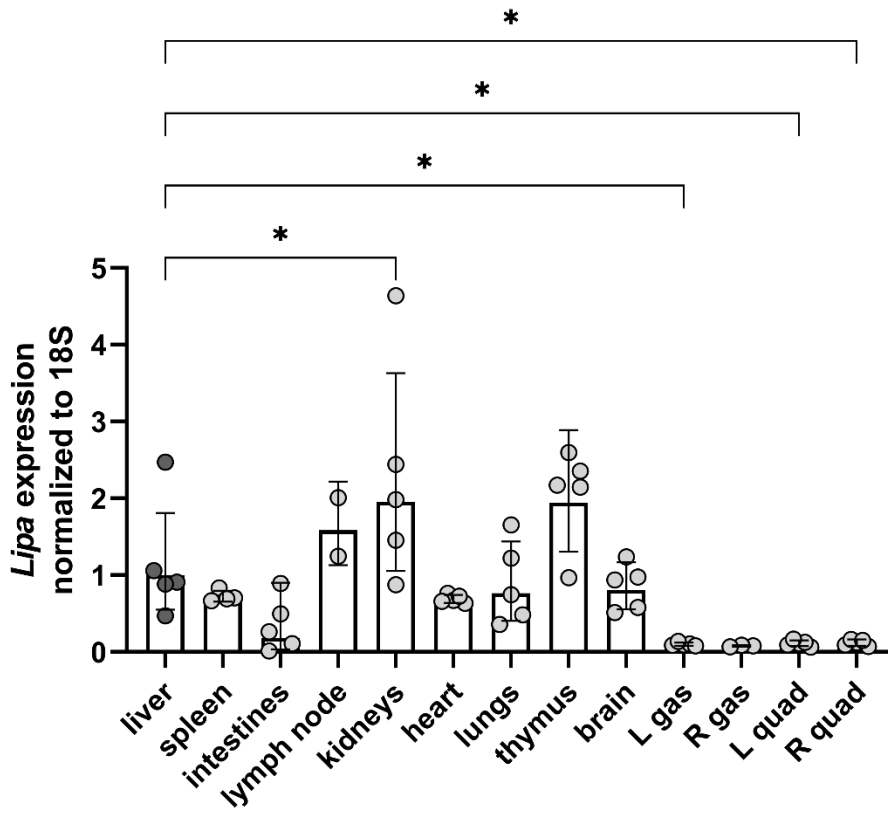

**Figure S5. Endogenous *Lipa* expression in various organs and tissues in WT mice.**

*Lipa* is expressed as relative to the liver. All data represented as mean  $\pm$  SD (n=2-8). Statistical significance relative to liver expression was defined as  $p \leq 0.05$  using one-way ANOVA with Tukey's post-hoc test.

### Relative to WT *Lipa*

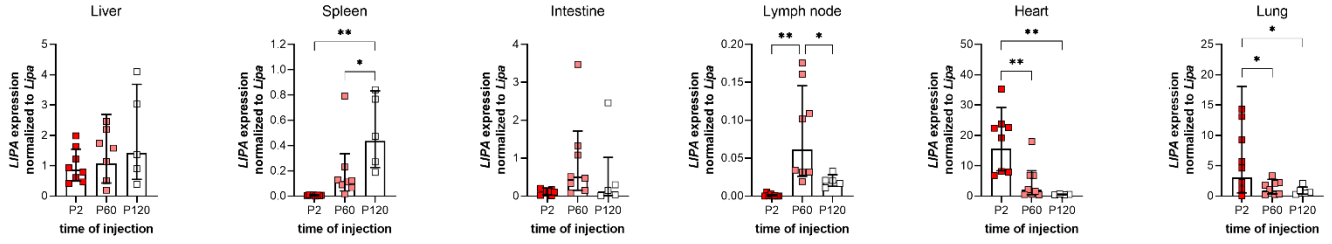

### Relative to P2

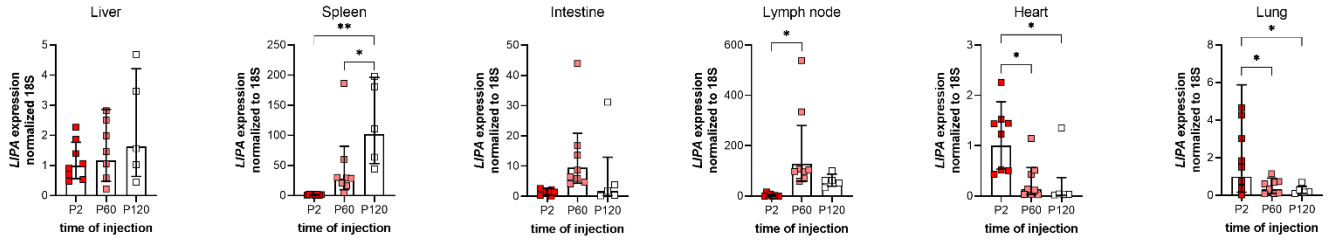

**Figure S6. RT-qPCR expression of the human *LIPA* transgene in treated mice at the 6 month endpoint.**

Expression data is presented as mRNA levels of human *LIPA* compared to the endogenous *Lipa* expression in WT, or compared to expression at when treated at P2. All data represented as mean  $\pm$  SD (n=5-8). Statistical significance was defined as  $p \leq 0.05$  (\* $p \leq 0.05$ , \*\* $p \leq 0.01$ ), using one-way ANOVA with Tukey's post-hoc test.

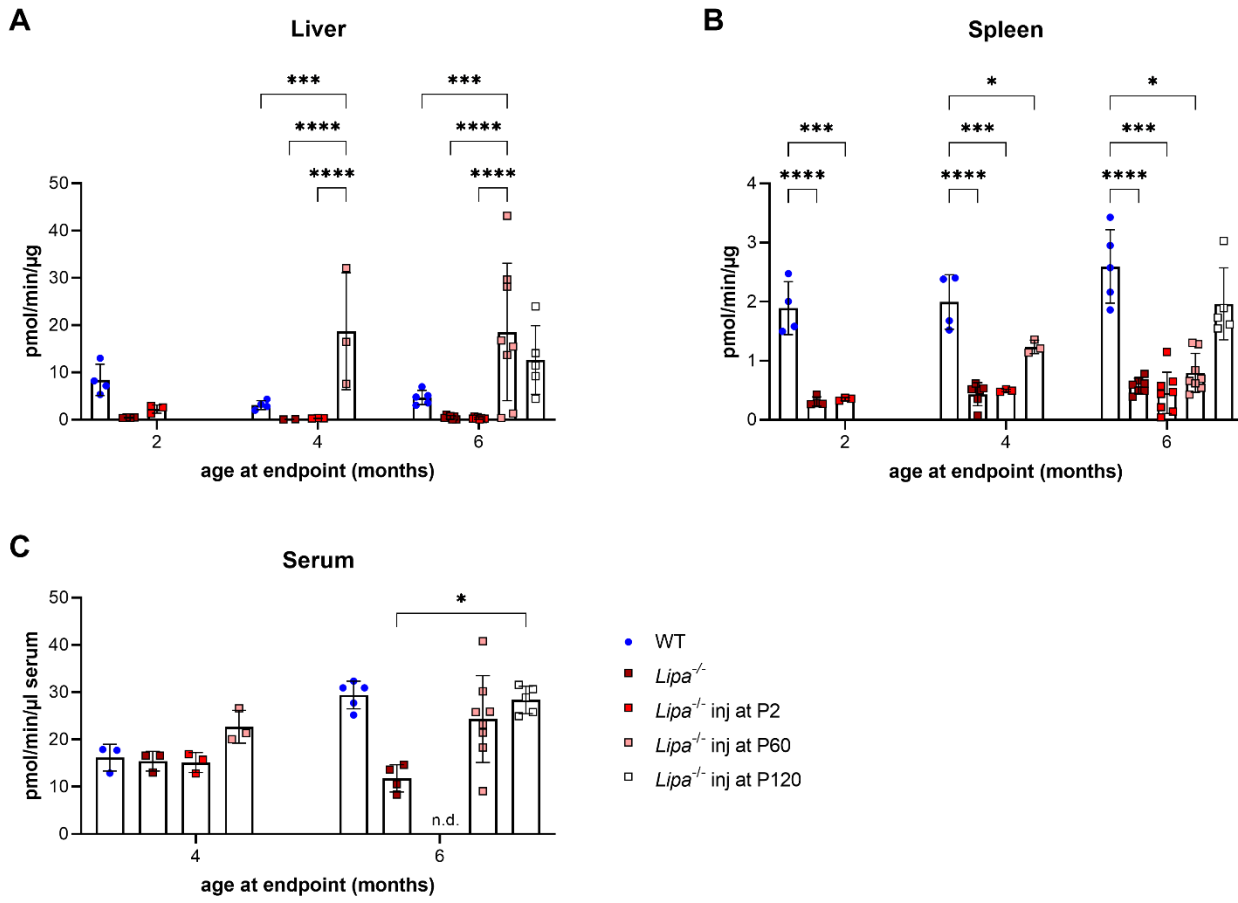

**Figure S7. Lysosomal acid lipase activity is reduced in *Lipa*<sup>-/-</sup> mice at all timepoints.**

Lysosomal acid lipase activity in **(A)** liver, **(B)** spleen, and **(C)** serum at 2, 4 and 6 months. Treatment at later time points (P60 and P120) result in restored enzyme activity in the liver. All data represented as mean  $\pm$  SD ( $n=5-8$ ). Statistical significance was defined as  $p \leq 0.05$  (\* $p \leq 0.05$ , \*\* $p \leq 0.01$ , \*\*\* $p \leq 0.001$ , \*\*\*\* $p \leq 0.0001$ ), using two-way ANOVA with Tukey's post-hoc test. n.d. = not determined due to insufficient sample.



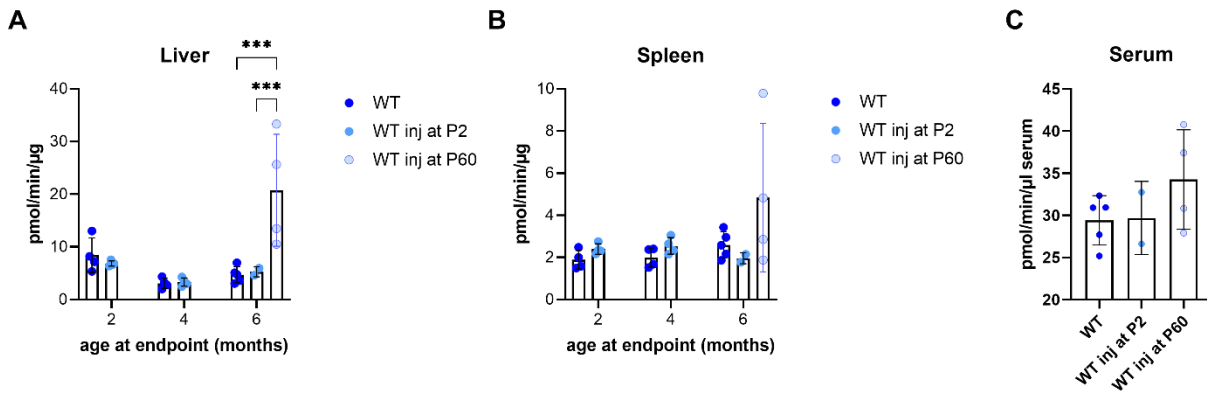

**Figure S8. Lysosomal acid lipase activity in treated WT mice.**

**(A)** Similar to treatment of *Lipa*<sup>-/-</sup> mice, only treatment at P60 resulted in statistically significant increase in LAL activity in liver. **(B)** Spleen LAL activity did not change with treatment in WT mice. **(C)** At the 6 month endpoint, serum LAL activity did not significantly change with treatment. Statistical significance was defined as  $p \leq 0.05$  (\*\* $p \leq 0.001$ ), using two-way ANOVA (A, B) or one-way ANOVA (C) with Tukey's post-hoc test.

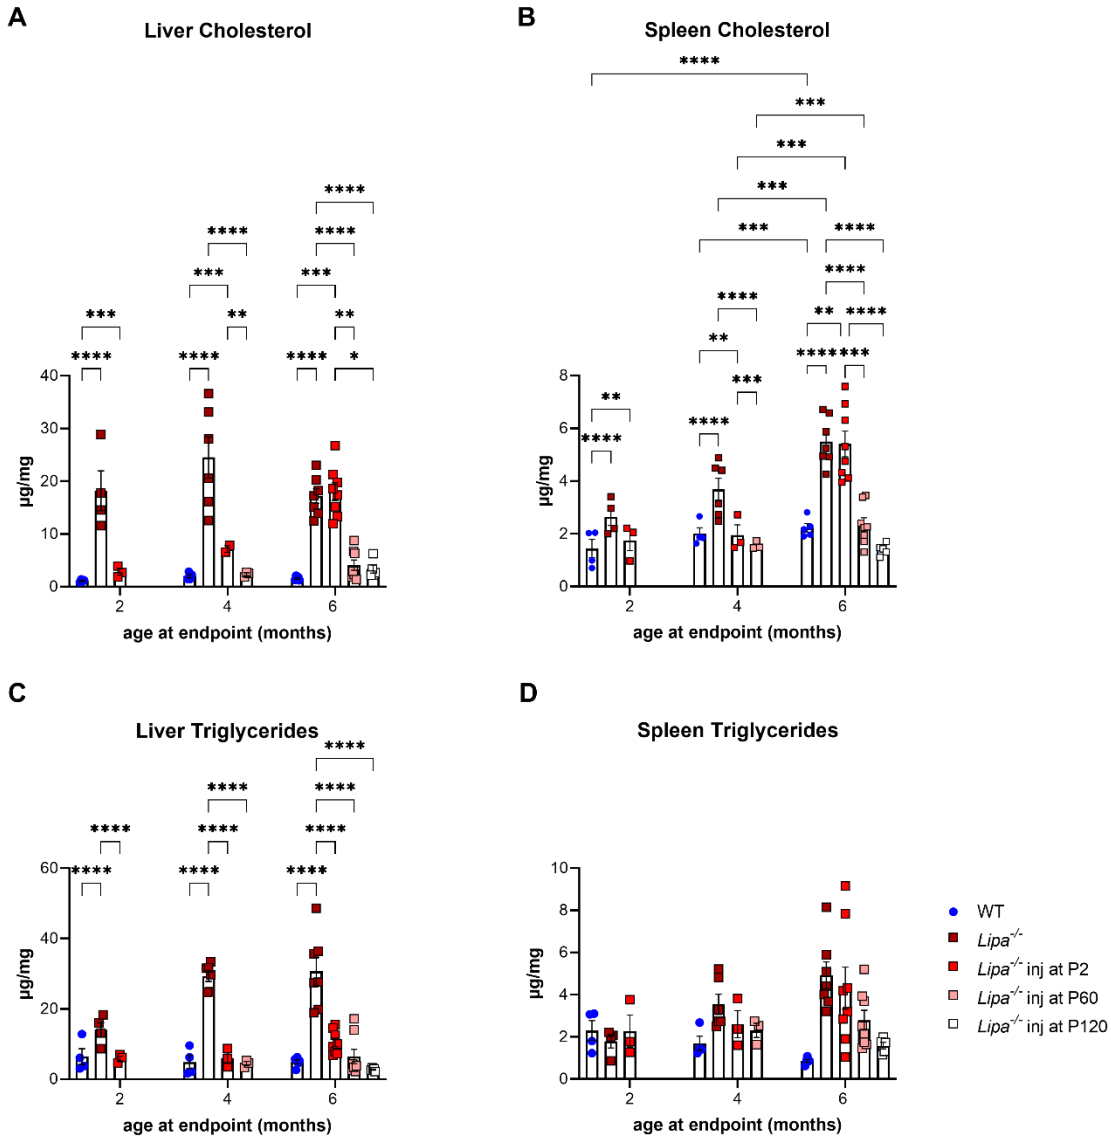

**Figure S9. Cholesterol and triglyceride content at 2, 4, 6 months of age.**

**(A-B)** Cholesterol content in (A) liver and (B) spleen at 2, 4, 6 months. **(C-D)** Triglyceride content in (C) liver and (D) spleen at 2, 4, 6 month endpoints. All data represented as mean  $\pm$  SD (n=3-8). Statistical significance was defined as  $p \leq 0.05$  (\* $p \leq 0.05$ , \*\* $p \leq 0.01$ , \*\*\* $p \leq 0.001$ , \*\*\*\* $p \leq 0.0001$ ), using two-way ANOVA with Tukey's post-hoc test.

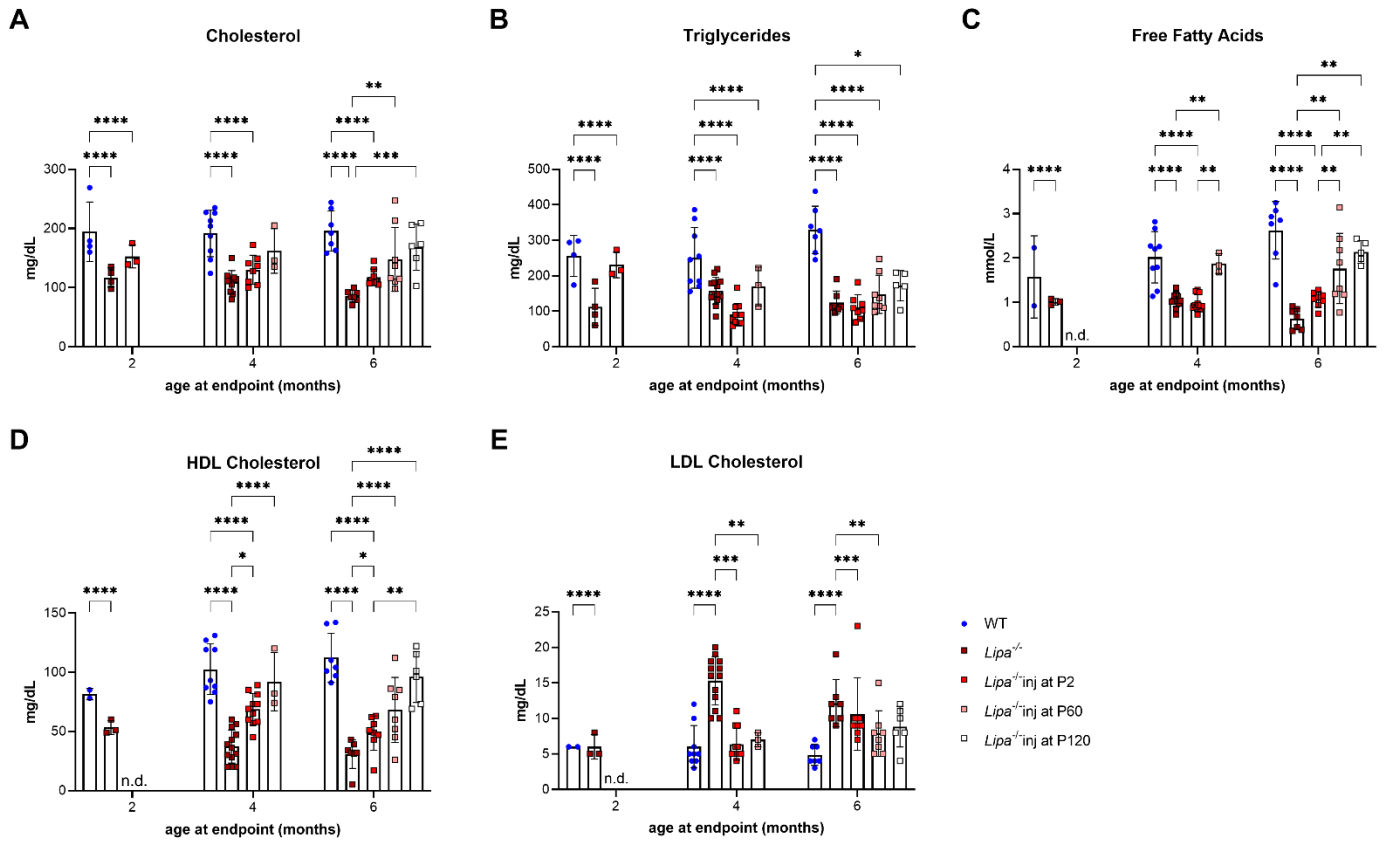

**Figure S10. Serum lipid panel at 2, 4, and 6 months.**

**(A)** Cholesterol, **(B)** Triglyceride, **(C)** free fatty acids **(D)** HDL cholesterol, **(E)** LDL cholesterol, and were measured in blood serum at 2, 4 and 6 months of age. All data represented as mean  $\pm$  SD (n=5-8). Statistical significance was defined as  $p \leq 0.05$  (\* $p \leq 0.05$ , \*\* $p \leq 0.01$ , \*\*\* $p \leq 0.001$ , \*\*\*\* $p \leq 0.0001$ ), using two-way ANOVA with Tukey's post-hoc test. n.d. = not determined due to insufficient sample at the 2-month endpoint.

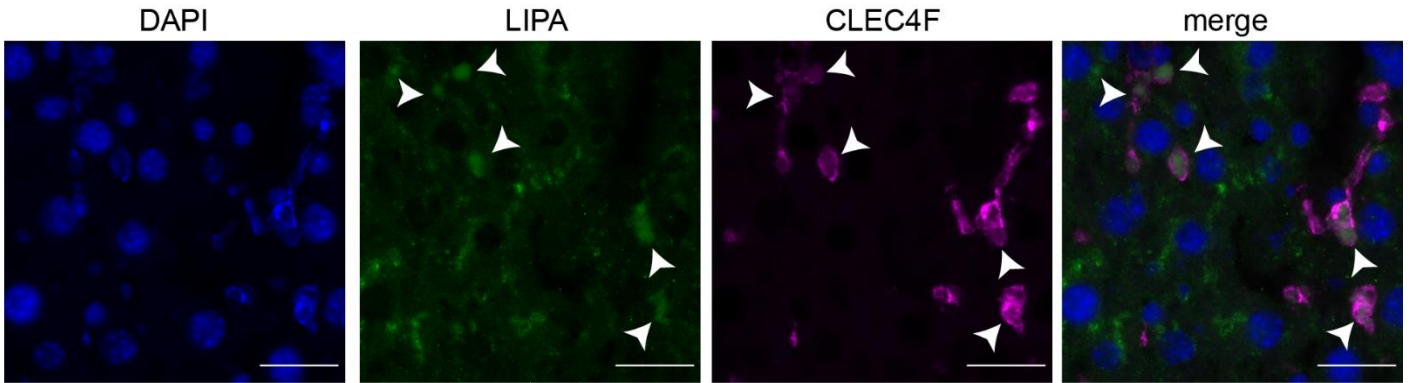

**Figure S11. LIPA is expressed in hepatocytes and Kupffer cells.**

Immunofluorescence staining of liver sections from WT mice treated at P60, 6 month endpoint. LIPA (green) is expressed throughout the liver. CLEC4F (magenta) is a Kupffer cell marker. The merged image shows co-localization of LIPA with CLEC45 (as indicated by arrows), as well as LIPA staining in hepatocytes (non-Kupffer cells). Scale bar = 25 $\mu$ m.

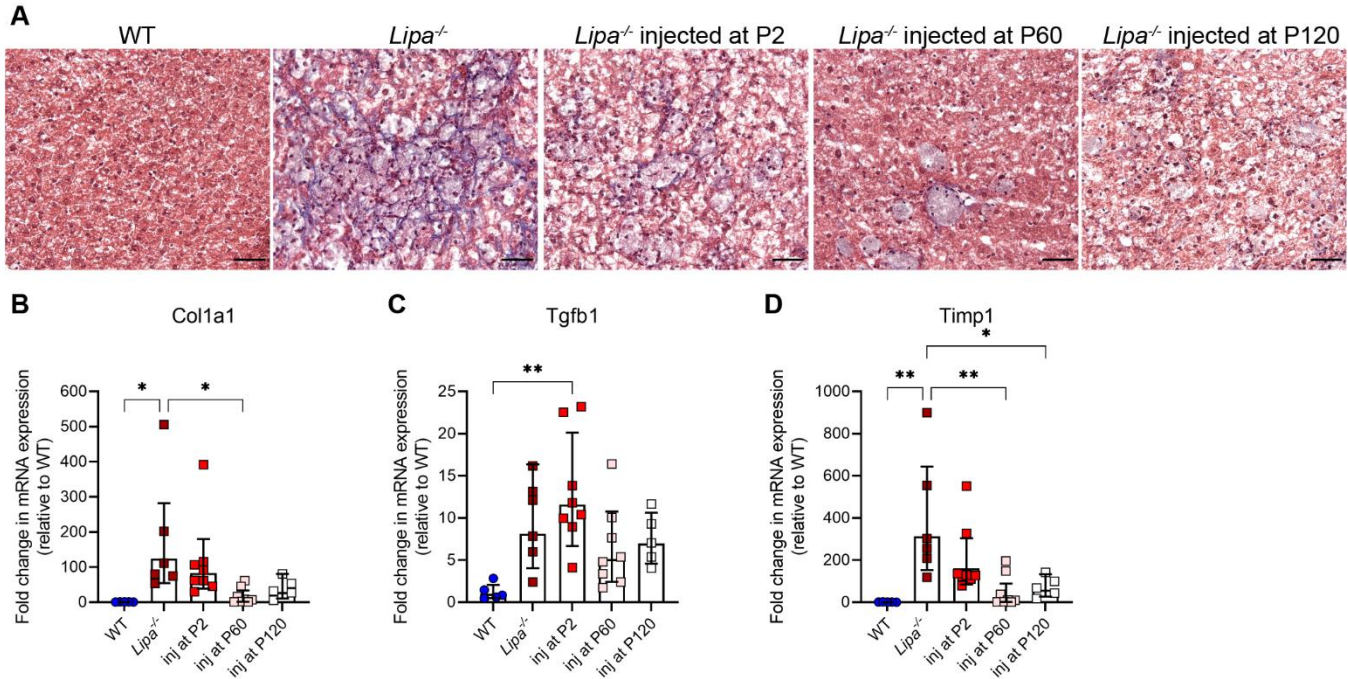

**Figure S12. Fibrosis is decreased with treatment in *Lipa*<sup>-/-</sup> mice.**

**(A)** Masson's Trichrome staining of liver sections at the 6 month endpoint. *Lipa*<sup>-/-</sup> mice show high amounts of fibrosis as evident from collagen staining (blue). Treatment at all timepoints decreases the amount of collagen staining. Scale bar = 25µm. **(B-D)** RT-qPCR was used to determine the expression of fibrosis genes (B) *Col1a1*, (C) *Tgfb1*, (D) *Timp1* in livers. All data represented as mean ± SD (n=2-8). Statistical significance was defined as p≤0.05 (\*p≤0.05, \*\*p≤0.01), using one-way ANOVA with Tukey's post-hoc test.

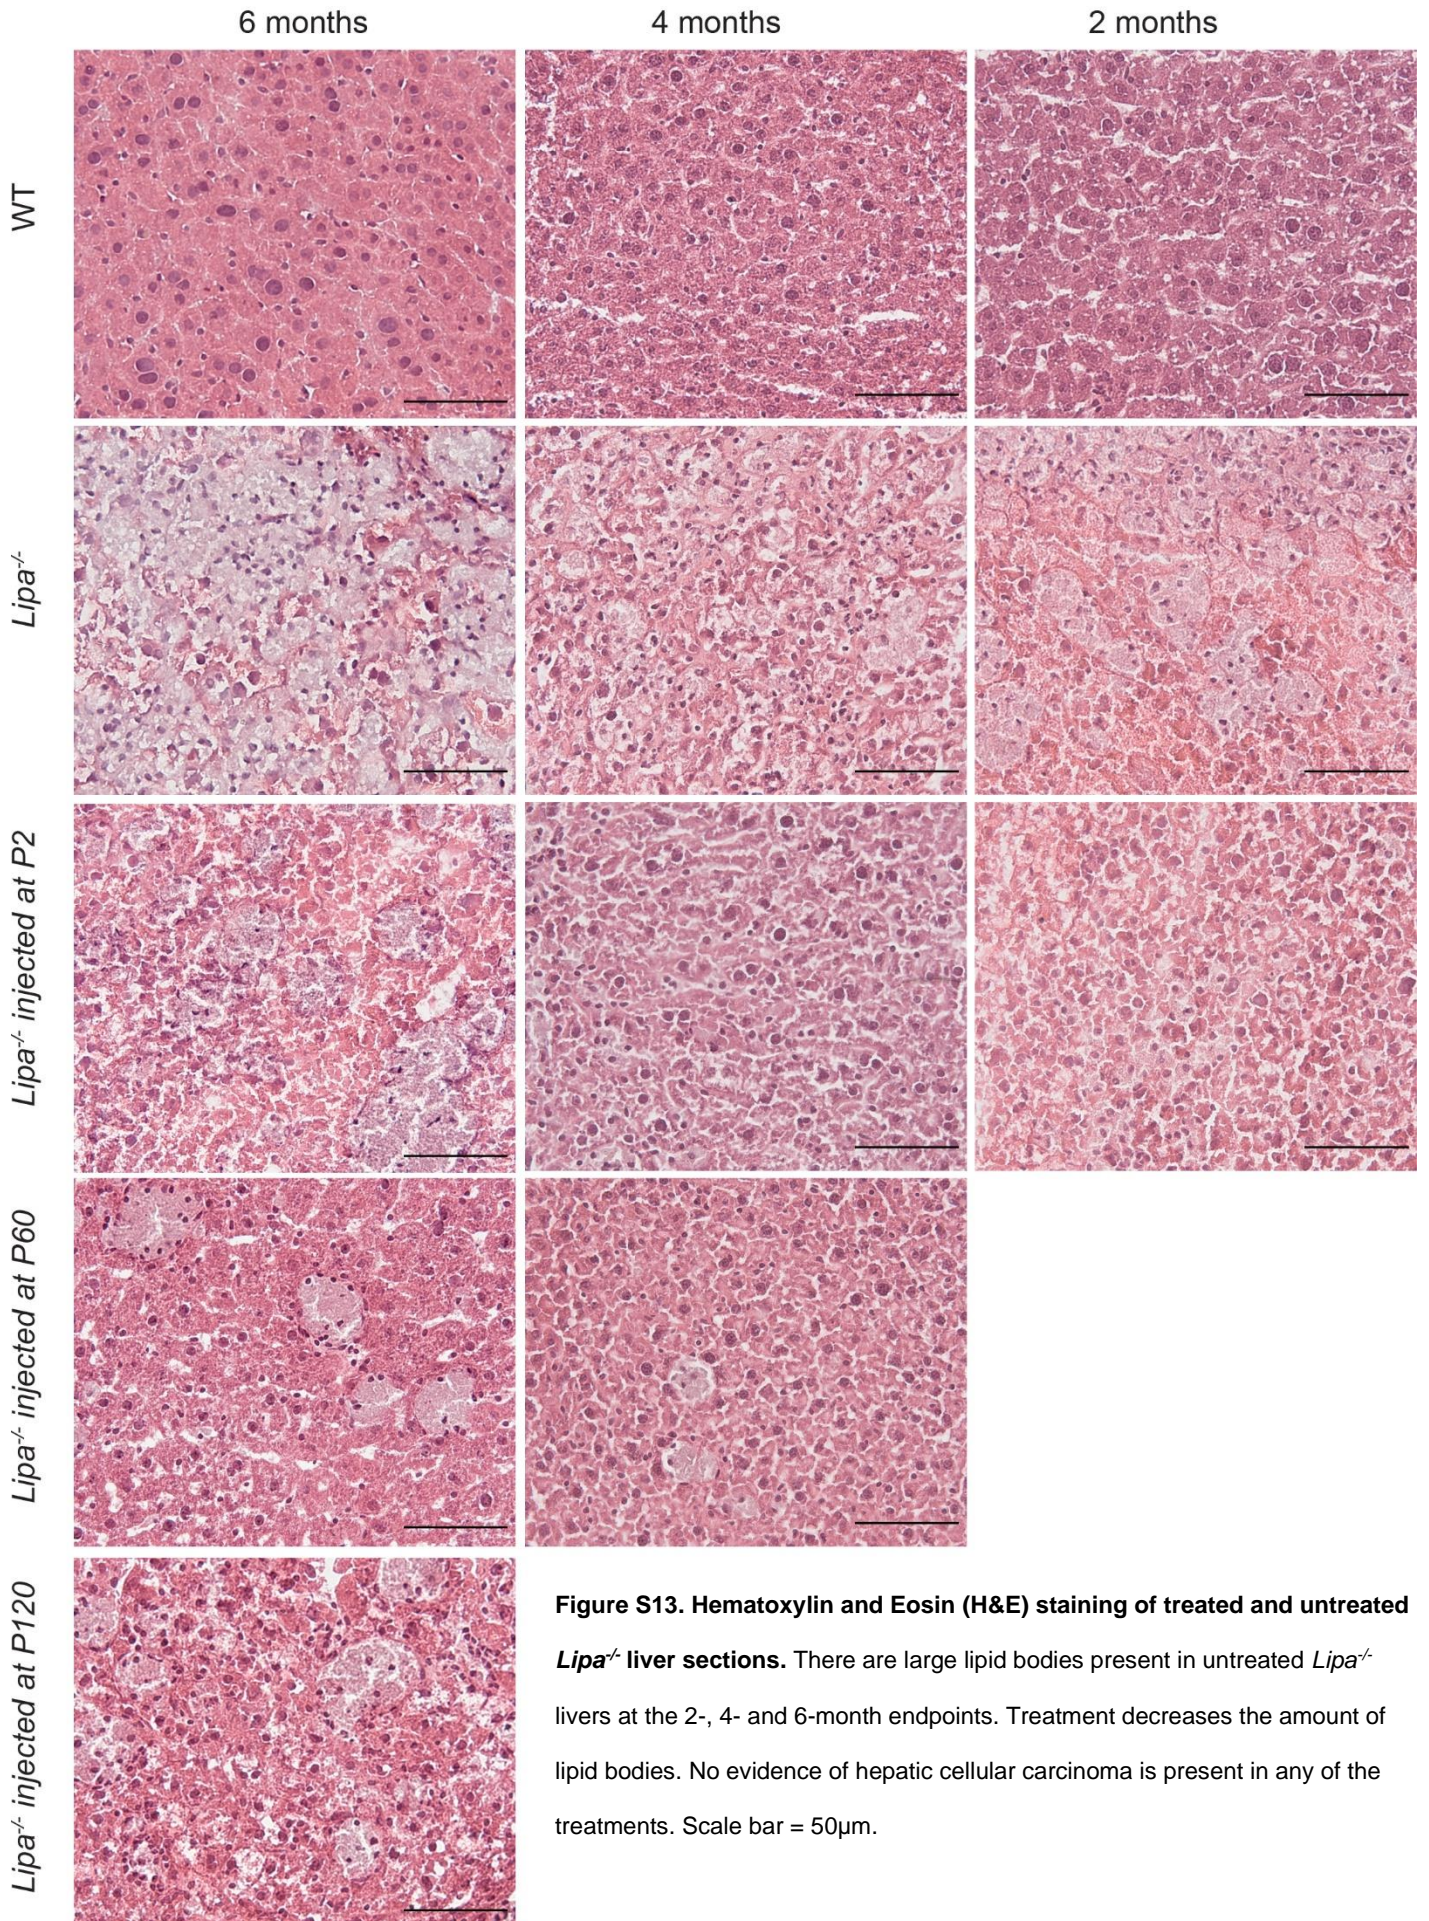

**Figure S13. Hematoxylin and Eosin (H&E) staining of treated and untreated *Lipa*<sup>-/-</sup> liver sections.** There are large lipid bodies present in untreated *Lipa*<sup>-/-</sup> livers at the 2-, 4- and 6-month endpoints. Treatment decreases the amount of lipid bodies. No evidence of hepatic cellular carcinoma is present in any of the treatments. Scale bar = 50 $\mu$ m.

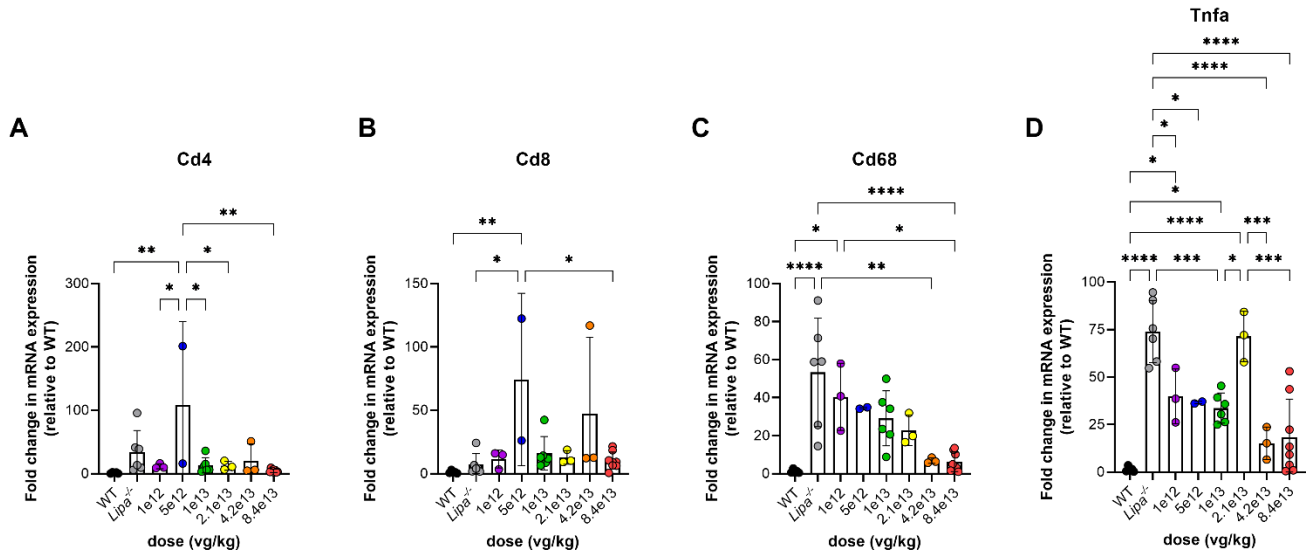

**Figure S14. RT-qPCR analysis of various markers of inflammation in livers after different doses of gene therapy.**

All data represented as mean  $\pm$  SD (n=2-8). Statistical significance was defined as  $p \leq 0.05$  (\* $p \leq 0.05$ , \*\* $p \leq 0.01$ , \*\*\* $p \leq 0.001$ ,

\*\*\*\* $p \leq 0.0001$ ), using one-way ANOVA with Tukey's post-hoc test.

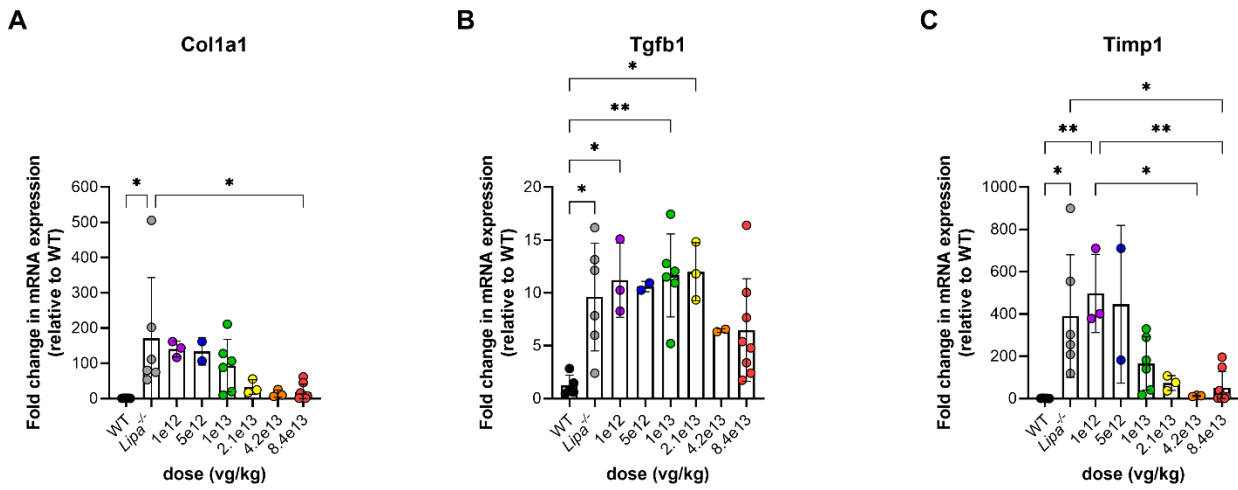

**Figure S15. RT-qPCR analysis of various markers of fibrosis after treatment with different doses.**

All data represented as mean  $\pm$  SD (n=2-8). Statistical significance was defined as  $p \leq 0.05$  (\* $p \leq 0.05$ , \*\* $p \leq 0.01$ ), using one-way ANOVA with Tukey's post-hoc test.



**Table S1.** Biodistribution of AAV at 6-month endpoint. Values are represented as mean vg/nucleus  $\pm$  SD.

|                        | Injected at P2 (n=8) | Injected at P60 (n=8) | Injected at P120 (n=5) |
|------------------------|----------------------|-----------------------|------------------------|
| <b>Brain</b>           | 1.20 $\pm$ 0.14      | 2.55 $\pm$ 0.81       | 1.64 $\pm$ 0.21        |
| <b>Heart</b>           | 21.82 $\pm$ 8.41     | 20.52 $\pm$ 8.79      | 12.94 $\pm$ 2.11       |
| <b>Intestines</b>      | 0.14 $\pm$ 0.05      | 17.93 $\pm$ 9.08      | 12.58 $\pm$ 3.73       |
| <b>Liver</b>           | 1.62 $\pm$ 0.39      | 406.13 $\pm$ 117.59   | 90.69 $\pm$ 21.48      |
| <b>Lung</b>            | 7.87 $\pm$ 1.16      | 23.91 $\pm$ 7.15      | 45.47 $\pm$ 14.73      |
| <b>Lymph node</b>      | 0.03 $\pm$ 0.01      | 8.14 $\pm$ 2.59       | 4.99 $\pm$ 1.94        |
| <b>L kidney</b>        | 0.48 $\pm$ 0.12      | 34.95 $\pm$ 11.97     | 33.00 $\pm$ 6.93       |
| <b>R kidney</b>        | 0.55 $\pm$ 0.09      | 30.66 $\pm$ 10.44     | 38.83 $\pm$ 8.58       |
| <b>Spleen</b>          | 0.07 $\pm$ 0.02      | 35.66 $\pm$ 13.19     | 28.31 $\pm$ 9.92       |
| <b>Thymus</b>          | 2.52 $\pm$ 1.28      | 49.44 $\pm$ 14.81     | 19.25 $\pm$ 8.36       |
| <b>L gastrocnemius</b> | 1.10 $\pm$ 0.15      | 10.75 $\pm$ 2.66      | 6.19 $\pm$ 3.48        |
| <b>R gastrocnemius</b> | 1.86 $\pm$ 0.73      | 10.79 $\pm$ 4.61      | 11.89 $\pm$ 5.07       |
| <b>L quadriceps</b>    | 1.65 $\pm$ 0.33      | 7.11 $\pm$ 1.48       | 4.55 $\pm$ 0.65        |
| <b>R quadriceps</b>    | 1.38 $\pm$ 0.25      | 7.50 $\pm$ 3.29       | 6.81 $\pm$ 1.53        |

**Table S2.** Biodistribution of AAV at the 4-month endpoint. Values are represented as mean vg/nucleus  $\pm$  SD.

|                        | <b>Injected at P2 (n=3)</b> | <b>Injected at P60 (n=3)</b> |
|------------------------|-----------------------------|------------------------------|
| <b>Brain</b>           | 1.70 $\pm$ 1.09             | 1.13 $\pm$ 0.48              |
| <b>Heart</b>           | 74.34 $\pm$ 18.01           | 0.97 $\pm$ 0.61              |
| <b>Intestines</b>      | 0.11 $\pm$ 0.02             | 8.97 $\pm$ 1.33              |
| <b>Liver</b>           | 9.21 $\pm$ 4.09             | 340.12 $\pm$ 37.33           |
| <b>Lung</b>            | 18.42 $\pm$ 3.32            | 18.61 $\pm$ 1.25             |
| <b>Lymph node</b>      | 0.02 $\pm$ 0.00             | 18.55 $\pm$ 5.58             |
| <b>L kidney</b>        | 0.66 $\pm$ 0.18             | 23.74 $\pm$ 4.53             |
| <b>R kidney</b>        | 0.84 $\pm$ 0.45             | 17.78 $\pm$ 3.59             |
| <b>Spleen</b>          | 0.08 $\pm$ 0.01             | 19.26 $\pm$ 1.79             |
| <b>Thymus</b>          | 1.63 $\pm$ 1.44             | 7.09 $\pm$ 4.36              |
| <b>L gastrocnemius</b> | 0.54 $\pm$ 0.06             | 4.09 $\pm$ 2.35              |
| <b>R gastrocnemius</b> | 0.95 $\pm$ 0.10             | 5.08 $\pm$ 3.09              |
| <b>L quadricep</b>     | 0.74 $\pm$ 0.29             | 0.91 $\pm$ 0.13              |
| <b>R quadricep</b>     | 0.68 $\pm$ 0.07             | 0.98 $\pm$ 0.14              |

**Table S3.** Biodistribution of AAV at the 2-month endpoint. Values are represented as mean vg/nucleus  $\pm$  SD.

|                        | <b>Injected at P2 (n=3)</b> |
|------------------------|-----------------------------|
| <b>Brain</b>           | 0.28 $\pm$ 0.06             |
| <b>Heart</b>           | 47.27 $\pm$ 4.76            |
| <b>Intestines</b>      | 0.05 $\pm$ 0.01             |
| <b>Liver</b>           | 10.73 $\pm$ 7.29            |
| <b>Lung</b>            | 6.85 $\pm$ 1.01             |
| <b>Lymph node</b>      | 0.46 $\pm$ 0.45             |
| <b>L kidney</b>        | 0.45 $\pm$ 0.09             |
| <b>R kidney</b>        | 0.51 $\pm$ 0.05             |
| <b>Spleen</b>          | 0.23 $\pm$ 0.07             |
| <b>Thymus</b>          | 1.15 $\pm$ 0.95             |
| <b>L gastrocnemius</b> | 2.92 $\pm$ 0.60             |
| <b>R gastrocnemius</b> | 2.23 $\pm$ 0.95             |
| <b>L quadriceps</b>    | 0.78 $\pm$ 0.15             |
| <b>R quadriceps</b>    | 0.67 $\pm$ 0.10             |

**Table S4.** Biodistribution of AAV at the various doses, treated at P60, 6 month endpoint. Values represent mean vg/nucleus ± SD.

|                        | <b>1.0x10<sup>12</sup> vg/kg<br/>(n=3)</b> | <b>5.0x10<sup>12</sup> vg/kg<br/>(n=2)</b> | <b>1.0x10<sup>13</sup> vg/kg<br/>(n=3)</b> | <b>2.1x10<sup>13</sup> vg/kg<br/>(n=3)</b> | <b>4.2x10<sup>13</sup> vg/kg<br/>(n=3)</b> | <b>8.4x10<sup>13</sup> vg/kg<br/>(n=8)</b> |
|------------------------|--------------------------------------------|--------------------------------------------|--------------------------------------------|--------------------------------------------|--------------------------------------------|--------------------------------------------|
| <b>Brain</b>           | 0.03±0.01                                  | 0.32±0.12                                  | 0.23±0.06                                  | 0.77±0.17                                  | 1.46±0.62                                  | 2.55±0.81                                  |
| <b>Heart</b>           | 0.18±0.03                                  | 0.87±0.33                                  | 1.80±0.65                                  | 3.70±2.38                                  | 12.51±1.55                                 | 20.52±8.79                                 |
| <b>Intestines</b>      | 0.21±0.05                                  | 0.88±0.08                                  | 1.94±0.61                                  | 4.29±2.21                                  | 10.72±3.26                                 | 17.93±9.08                                 |
| <b>Liver</b>           | 0.03±0.00                                  | 1.58±0.06                                  | 10.84±5.88                                 | 39.99±12.80                                | 316.38±95.55                               | 406.13±117.59                              |
| <b>Lung</b>            | 0.15±0.02                                  | 0.89±0.53                                  | 2.28±0.84                                  | 3.30±0.15                                  | 23.89±8.48                                 | 23.91±7.15                                 |
| <b>Lymph node</b>      | 0.03±0.00                                  | 0.93±0.68                                  | 0.38±0.11                                  | 0.75±0.37                                  | 5.32±4.45                                  | 8.14±2.59                                  |
| <b>L kidney</b>        | 0.11±0.02                                  | 1.49±0.67                                  | 3.98±2.15                                  | 10.94±4.56                                 | 24.38±3.99                                 | 34.95±11.97                                |
| <b>R kidney</b>        | 0.14±0.04                                  | 1.92±0.16                                  | 4.39±1.99                                  | 9.23±2.65                                  | 44.94±10.31                                | 30.66±10.44                                |
| <b>Spleen</b>          | 0.02±0.00                                  | 0.31±0.21                                  | 1.13±0.48                                  | 3.24±1.32                                  | 33.41±12.28                                | 35.66±13.19                                |
| <b>Thymus</b>          | 0.22±0.11                                  | 0.82±0.15                                  | 3.08±1.13                                  | 6.73±1.84                                  | 74.99±2.58                                 | 49.44±14.81                                |
| <b>L gastrocnemius</b> | 0.12±0.02                                  | 1.47±0.96                                  | 0.92±0.20                                  | 2.66±1.21                                  | 6.97±2.76                                  | 10.75±2.66                                 |
| <b>R gastrocnemius</b> | 0.36±0.19                                  | 1.65±1.21                                  | 1.19±0.40                                  | 2.54±0.73                                  | 12.25±4.62                                 | 10.79±4.61                                 |
| <b>L quadricep</b>     | 0.15±0.03                                  | 1.09±0.73                                  | 0.64±0.12                                  | 1.54±0.61                                  | 9.26±3.41                                  | 7.11±1.48                                  |
| <b>R quadricep</b>     | 0.10±0.02                                  | 0.27±0.11                                  | 0.66±0.14                                  | 1.37±0.67                                  | 6.18±4.14                                  | 7.50±3.29                                  |

**Table S5.** Sequences of primers used in this study

|                                                           |         | <b>Sequence</b>                                       |
|-----------------------------------------------------------|---------|-------------------------------------------------------|
| WT – 323 bp                                               | exon5-F | 5'- CTGCATGGAGACTCACAAAGGA- 3'                        |
|                                                           | exon5-R | 5'- AAGTCTTCCCTGTTCCCATGG- 3'                         |
| LAL KO – 203 bp                                           | HPRT-F  | 5'- CGTCGTGATTAGCGATGATGA- 3'                         |
|                                                           | HPRT-R  | 5'- TCCAGCAGGTCAGCAAAGAA-3'                           |
| AAV biodistribution                                       | Primer1 | 5'-TGACGTCAATGGGAGTTTGTT-3'                           |
|                                                           | Primer2 | 5'-ATATAGACCTCCCACCGTACAC-3'                          |
|                                                           | Probe   | 5'-/56-FAM/CATTGACGC/ZEN/AAATGGGCGGTAGG/3IABkFQ/-3'   |
| Human <i>LIPA</i> expression                              | Primer1 | 5'-ACTAGAATCTGCCAGCAAGC-3'                            |
|                                                           | Primer2 | 5'-TCTGTGCCTTAACCGAATTCC-3'                           |
|                                                           | Probe   | 5'-/56-FAM/TCCCAAACC/ZEN/AGTTGTCTTCCTGCA/3IABkFQ/-3'  |
| Mouse <i>Lipa</i> expression                              | Primer1 | 5'-ATTCTCAAGGCTGCACCATAG-3'                           |
|                                                           | Primer2 | 5'-CAAGCGTCCCAATTGAAGTAG-3'                           |
|                                                           | Probe   | 5'-/56-FAM/TTAGTCTTG/ZEN/GCTCCCGTGTTGTCTC/3IABkFQ/-3' |
| Eukaryotic 18S rRNA Endogenous Control                    |         | ThermoFisher Cat# 4319413E                            |
| Pre-designed Taqman Gene Expression Assays (ThermoFisher) |         |                                                       |
| <b>Gene</b>                                               |         | <b>Assay ID</b>                                       |
| Cd4                                                       |         | Mm00442754_m1                                         |
| Cd8a                                                      |         | Mm01182108_m1                                         |
| Cd68                                                      |         | Mm00839636_m1                                         |
| Tnfa                                                      |         | Mm99999068_m1                                         |
| Col1a1                                                    |         | Mm00801666_g1                                         |
| Tgfb1                                                     |         | Mm01178820_m1                                         |
| Timp1                                                     |         | Mm00441818_m1                                         |

**Table S6. Complete sequence of the therapeutic cassette (miniCMV promoter-*hLPA-SV40* polyA) including the AAV2 ITR and truncated ITR region.**

CTGCGCGCTCGCTCGCTCACTGAGGCCGCCCGGGCAAAGCCCGGGCGTCGGGCGACCTTTGGTCGCCCCGGCCTCAGTGAGCGAGCGAGCGCGCAGAG  
 AGGGAGTGGCCAACCTCCATCACTAGGGGTTCCCTAGGAAGCTTTCGTTACATAACTTACGGTAAATGGCCCCGCTGGCTGACCGCCCAACGACCCCCG  
 GACTCACGGGGATTCCAAGTCTCCACCCATTGACGTCAATGGGAGTTTGTGTTTGGCACCAAAATCAACGGGACTTCCAAAAATGTCGTAACAACT  
 CCGCCCCATTGACGCAAAATGGGCGGTAGGCGTGTACGGTGGGAGGTCTATATAAGCAGAGCTCGTTTGTGTAACCGCTCGACCGGGGTACCCGGCCG  
 GCTAGCCGCCACCATGAAAATGCGGTTCTTGGGGTTGGTGGTCTGTTTGGTTCTCTGGACCCCTGCATTCTGAGGGGTCTGGAGGGAAACTGACAGCT  
 GTGGATCCTGAAACAAACATGAATGTGAGTGAATTTACTCTTACTGGGGATTCCTAGTGAGGAATACCTAGTTGAGACAGAAGATGGATATATTC  
 TGTGCCTTAACCGAATTCTCATGGGAGGAAGAACCATTCTGACAAAGGTCCCAAACAGTTGTCTTCTGCAACATGGCTTGCTGGCAGATTCTAG  
 TAACTGGGTCACAAACCTTGCCAACAGCAGCCTGGGCTTCATTCTTGCTGATGCTGGTTTTGACGTGTGGATGGGCAACAGCAGAGGAAATACCTGG  
 TCTCGAAACATAAGACTCTCAGTTTCTCAGGATGAATTCGGGCTTTCAGTTATGATGAGATGGCAAAATATGACCTACCAGCTTCCATTAACCT  
 TCATCTGAATAAAACTGGCCAAGAACAAGTGTATATGTGGGTCATTCTCAAGGCACCACTATAGGTTTTTATAGCATTTTTCACAGATCCCTGAGCT  
 GGCTAAAAGGATTAATAATGTTTTTGGCCCTGGGTCCTGTGGCTTCCGTCGCCTTCTGTACTAGCCCTATGGCCAAATTAGGACGATTACCAGATCAT  
 CTCATTAAGGACTTATTTGGAGACAAAGAATTTCTTCCCCAGAGTGCCTTTTTGAAGTGGCTGGGTACCCACGTTTGCATCATGTCATACTGAAGG  
 AGCTCTGTGGAAATCTCTGTTTTCTCTGTGTGGATTTAATGAGAGAAATTTAAATATGTCTAGAGTGGATGTATATAACAACATTTCTCTGCTGG  
 AACTTCTGTGCAAAACATGTTACTGAGCCAGGCTGTTAAATTCAAAAGTTTCAAGCCTTTGACTGGGGAAGCAGTGCCAGAATTAATTTTCAT  
 TACAACCAGAGTTATCCTCCACATACAATGTGAAGGACATGCTTGTGCCACTGCAGTCTGGAGCGGGGTCACGACTGGCTTGCAGATGTCTACG  
 ACGTCAATATCTTACTGACTCAGATCACCAACTTGGTGTCCATGAGAGCATTCCGGAATGGGAGCATCTTGACTTCATTTGGGGCCTGGATGCCCC  
 TTGGAGGCTTTATAATAAAATTAATTAATCTAATGAGGAAATATCAGTGAGCATGCACTAGTGCGCCGCGGATCTCAGACATGATAAGATACATTGA  
 TGAGTTTGGACAAACCACAACCTAGAATGCAGTAAAAAAATGCTTTATTTGTGAAATTTGTGATGCTATTGCTTTATTTGTAACCATTATAAGCTGC  
 AATAACAAGTTAACAACAACAATGCATTCATTTTATGTTTCAGGTTTCAGGGGAGGTGTGGGAGTTTTTTAGGTTTAAACCCCACTCCCTCTCT  
 CGCGCTCGCTCGCTCACTGAGGCCGGGCGACCAAGGTCGCCCCGACGCCCGGGCTTTGCCCGGGCGGCCTCAGTGAGCGAGCGAGCGCGCAG
